# Supplementary material
Source: PubMed Central journal article supplement (PMC9289720)
Supplement: NIHMS927598-supplement-dummy_label.pdf [file NIHMS927598-supplement-dummy_label.pdf]

## APPENDIX. Participating Centers and Committees in the PTVT Study

### Clinical Centers:

**Bascom Palmer Eye Institute, University of Miami Miller School of Medicine (Miami, Florida):** Principal Investigator: Steven Gedde, M.D.; Coinvestigators: Michael Banitt, M.D., Donald Budenz, M.D., M.P.H., Richard Lee, M.D., Ph.D., Paul Palmberg, M.D. Ph.D., Richard Parrish II, M.D., Luis Vazquez, M.D., Ph.D., Sarah Wellik, M.D., Mark Werner, M.D.

**Cincinnati Eye Institute (Cincinnati, Ohio):** Principal Investigator: Jeffrey Zink, M.D.; Coinvestigator: Anup Khatana, M.D.

**Glaucoma Associates of Texas (Dallas, Texas):** Principal Investigator: Davinder Grover, M.D., M.P.H.; Coinvestigator: Arvind Neelakantan, M.D.

**Moorfields Eye Hospital (London, United Kingdom):** Principal Investigator: Keith Barton, M.D.; Coinvestigators: Ahmed El Karmouty, M.D., Renata Puertas, M.D.

**New York Eye and Ear Infirmary (New York, New York):** Principal Investigator: Joseph Panarelli, M.D.; Coinvestigator: Kateki Vinod, M.D.

**Queen Mary's Hospital (Sidcup, United Kingdom):** Principal Investigator: Saurabh Goyal, M.D.

**St. Louis University (St. Louis Missouri):** Principal Investigator: John Lind, M.D.; Coinvestigator: Steven Shields, M.D.

**St. Thomas Hospital (London, United Kingdom):** Principal Investigator: Kin Sheng Lim, M.D.; Coinvestigator: Pouya Alaghband, M.D.

**University of California, Davis (Sacramento, California):** Principal Investigator: James Brandt, M.D.

**University of Florida (Gainesville, Florida):** Principal Investigator: Mark Sherwood, M.D.

**University of Oklahoma (Oklahoma City, Oklahoma):** Principal Investigator: Mahmoud Khaimi, M.D.

**University of Pennsylvania (Philadelphia, Pennsylvania):** Principal Investigator: Prithvi Sankar, M.D.; Coinvestigators: Husam Ansari, M.D., Ph.D., Eydie Miller-Ellis, M.D.

**University of Texas Houston (Houston, Texas):** Principal Investigator: Robert Feldman, M.D.; Coinvestigators: Laura Baker, Nicholas Bell, M.D.

**University of Toronto (Toronto, Canada):** Principal Investigator: Iqbal Ahmed, M.D.; Coinvestigator: Donna Williams

**University of Virginia (Charlottesville, Virginia):** Principal Investigator: Bruce Prum, M.D.

**Wilmer Eye Institute, Johns Hopkins University (Baltimore, Maryland):** Principal Investigator: Pradeep Ramulu, M.D., Ph.D.; Coinvestigator: Henry Jampel, M.D.

**Statistical Coordinating Center, Bascom Palmer Eye Institute, Miller School of Medicine, University of Miami (Miami, Florida):** William Feuer, M.S., Luz Londono, Joyce Schiffman, M.S., Wei Shi, M.S., Yolanda Silva, Elizabeth Vanner, Ph.D.

**Safety and Data Monitoring Committee:** Philip Chen, M.D., William Feuer, M.S., Dale Heuer, M.D., Joyce Schiffman, M.S., Kuldev Singh, M.D., M.P.H., Martha Wright, M.D.

**Steering Committee:** Iqbal Ahmed, M.D., Keith Barton, M.D., James Brandt, M.D., Robert Feldman, M.D., Steven Gedde, M.D., Saurabh Goyal, M.D., Davinder Grover, M.D., Dale Heuer, M.D., Mahmoud Khaimi, M.D., John Lind, M.D., Kin Sheng Lim, M.D., Joseph Panarelli, M.D., Richard Parrish II, M.D., Bruce Prum, M.D., Pradeep Ramulu, M.D., Ph.D., Prithvi Sankar, M.D., Mark Sherwood, M.D., Jeffrey Zink, M.D.

**Study Chairmen:** Steven Gedde, M.D., Dale Heuer, M.D., Richard Parrish II, M.D.
